## **Review of UNAIDS national estimates of men who have sex with men, gay dating application users, and 90-90-90 data**

Reuben Granich<sup>1</sup>, Somya Gupta<sup>1</sup>, Alex Garner<sup>2</sup>, Sean Howell<sup>2</sup>

1. International Association of Providers of AIDS Care (IAPAC), Washington DC, United States
2. Hornet, San Francisco, California, United States

### **Address correspondence and reprint requests to:**

Reuben Granich, MD, MPH

Strategy and Science Advisor

International Association of Providers of AIDS Care (IAPAC)

2200 Pennsylvania, NW

4<sup>th</sup> Floor East, Washington D.C. 20037, The United States

Email: [rgranich@iapac.org](mailto:rgranich@iapac.org)

**Conflict of interest:** None of the authors have conflicts of interest to declare.

**Running title:** Social Media and Estimating MSM

**Word count:** 1,416 **References:** 28 **Tables:** 1 **Figures:** 1

**Keywords:** HIV; AIDS; Social Media; Surveillance; Estimates; 90-90-90; Key populations; men who have sex with men; antiretroviral treatment; treatment as prevention; care continua,

## **Abstract**

### **Background**

Achieving the 90-90-90 is essential to keep people alive and to end AIDS. Men who have sex with men (MSM) often have the least access to HIV services.

### **Purpose**

Estimates for key populations are often unavailable, dated or have very wide confidence intervals and more accurate estimates are required.

### **Methods**

We compared registered users from a major gay dating application (2016) from 29 countries with the latest available (2013-2015) UNAIDS estimates by country. We searched the Internet, PubMed, national surveillance reports, UNAIDS country reports, President's Emergency Plan for AIDS Relief (PEPFAR) 2016 and 2017 operational plans, and conference abstracts for the latest nationally representative continua for MSM.

### **Results**

Of comparison countries, only 15 countries had UNAIDS or other MSM population estimates in the public domain. UNAIDS estimates were larger than the gay dating application users in 5 countries, perhaps reflecting incomplete market penetration for the application. However, the gay dating application users in 10 countries were above the UNAIDS estimates; all were over 30% higher and three more than double the reported estimate. Seven partial or complete nationally representative care continua for MSM were published between 2010 and 2016. Among estimated MSM living with HIV, viral suppression varied between 3% (Thailand) to 79% (United Kingdom). The quality of the continua methods varied (quality data not shown).

### **Conclusion**

"What is not monitored is not done" and social media has significant promise to improve estimates to ensure that MSM and other vulnerable people living with HIV and their communities are not left behind on the way to ending AIDS.

## Introduction

More than 37 million people are living with HIV with 18.2 million (50%) on treatment that prevents illness, death and transmission (1). Achieving the 90-90-90 target (By 2020, 90% of all people living with HIV will know their HIV status, 90% of all people with diagnosed HIV infection will receive sustained antiretroviral therapy, and 90% of all people receiving antiretroviral therapy will have viral suppression) is essential to keep people alive and to end AIDS (2). Men who have sex with men (MSM<sup>1</sup>) bear disproportionate burdens of HIV but often have the least access to HIV services. Stigma and discrimination remain as major factors in MSM vulnerability to HIV and lack of access to services. Although population estimates are available for adults and children, estimates for key populations including men who have sex with men (MSM) are often unavailable, dated or have very wide confidence intervals (3). Estimates of MSM are rarely population-based or representative and often rely instead on potentially biased smaller observational studies or surveys in sexually transmitted disease clinics or other service settings (4-9). The lack of accurate MSM population estimates compromises the HIV response in a number of important ways including the ability to plan and budget for MSM specific services, ability to measure progress in service delivery and health impact, and impaired ability to address stigma and discrimination. The dearth of solid denominators also makes it problematic to estimate the 90-90-90 target that is vital for preventing illness, death and transmission among MSM.

Over 3.5 billion people worldwide are connected to the Internet with over 2 billion from developing countries--cloud-based information and applications are increasing important in everyday life (10). Public health has warily embraced social media and there are an increasingly wide array of applications to solve public health challenges (11-14). Calls to improve individual and public health through open data, crowd-sourcing information and big data have been met with general enthusiasm although some have urged caution. Social media increasingly reflects and influences and reflects the sexual habits of millions of people who use applications for meeting

---

<sup>1</sup> Here we use MSM but the community prefers the word gay

people, dating, and to arrange to have sex. With millions of users coming from a wide spectrum of the society, social media users may provide new insights into population size estimates.

We used data from a popular gay software application that is designed to make it easy for gay, bi, and curious guys to connect in various ways (15). It is a global application and has over 20 million unique users in over 30 countries. Its widespread popularity, and relative anonymity raises the question whether the number of users can be used to improve official the Joint United Nations Programme on HIV/AIDS (UNAIDS) and national MSM estimates.

## **Methods**

To examine the relationship between the gay dating application users and MSM population estimates, we compared the 2016 registered dating application users from 29 countries with the latest available (2013-2015) UNAIDS (16) and national estimates (6, 17) by country (Figure 1). Countries were selected with over 27,000 gay dating application users to protect their identity and possible identification. Unique individual dating application users active during the study period were identified using device, location, usage, and registration information. Methods to determine the UNAIDS estimates for MSM rely on observational studies, surveys and expert opinion. To address progress towards the 90-90-90 target and as an insight to access to services, we also searched the Internet, PubMed, national surveillance reports, UNAIDS country reports, President's Emergency Plan for AIDS Relief (PEPFAR) country/regional operational plans 2016 and 2017, and conference abstracts for the most recent, complete and nationally representative continua for MSM (18-20).

## **Results**

Comparing UNAIDS with dating application user data revealed a number of discrepancies (Table 1). Of the 29 countries, only 15 had UNAIDS or other MSM population estimates in the public domain. In 10 of 29 countries, the number of gay dating application users were above the UNAIDS estimate of the number of MSMs with all over 30% higher and three more than double the

reported estimate. In 5 countries UNAIDS estimates were larger than dating application user numbers, perhaps reflecting early or incomplete market penetration for the application. Gay dating application users are younger and tech savvy and likely represent a sub-set of all MSM--the application user totals are probably an underestimate of the total MSM population. For the 29 countries, we found only 7 partial or complete nationally representative care continua for MSM published between 2010 and 2016. Among estimated MSM living with HIV, viral suppression varied between 3% (Thailand) to 79% (United Kingdom). The quality of the continua methods varied (quality data not shown) (18-20).

## **Discussion**

The response to HIV has included unprecedented advances in our knowledge and understanding of how to end the epidemic. Access to HIV services including care, treatment and other prevention interventions has saved millions of lives. Since 2003, global efforts to scale up antiretroviral therapy (ART) have played a major role in halting and reversing the HIV epidemic in many settings. Recent scientific advances have demonstrated that immediate use of ART irrespective of CD4 cell count can reduce HIV-related morbidity, mortality, transmission and costs (21-24). However, for the benefits of immediate ART to be fully realized, people living with HIV (PLHIV), especially the high-risk populations, must optimally engage to support each step along the HIV care continua (25), from early diagnosis to access to ART and viral suppression. Our study highlights significant discrepancies between official estimates of MSM and the number of individual users of gay dating applications. While only a selective sample, 30% higher numbers in 10 countries suggest that the current methodology for estimating the number of MSM should be reconsidered in light of this new data source.

Our study has potential limitations including uncertainties and variations inherent in the UNAIDS MSM estimation process, the paucity of published national cascades for key populations, and the potential to only temporarily use the gay dating application to meet other men. Finding higher gay dating application user numbers when compared with official estimates makes

common sense since it is arguably easier and more anonymous to use a gay dating application than to respond to interview questions from clinicians or people implementing household or other surveys. While certainly not definitive, the number of people using gay dating applications provides another potential data point that can be used when considering the HIV response strategy including service delivery efforts for MSM.

“What is not monitored is not done” and global estimates of key population denominators are vital to a successful HIV response. UNAIDS leads the global estimates working group that develops national estimates for key populations (16). While some have made the legitimate argument that collecting data on MSM can put their lives at risk in some settings, it is also recognized that without collecting this information it will be difficult to know whether MSM are successfully accessing services. Additionally, this lack of information hampers the ability to design and properly fund MSM specific services. Our study showed significant differences between the number of users of a popular gay dating application when compared with UNAIDS estimates for some countries. There are many possible reasons for this including lack of national studies or data, inaccurate modeling, unknown HIV prevalence, incidence and/or treatment access for MSM. Additionally, some countries deny the existence of MSM. Regardless, the social media derived data from Gay dating applications provide an important insight into population estimates and could be used in estimation exercises. Estimates are just that, estimates, and information that provides a means to triangulate on data points should help improve their accuracy. Consideration could also be given to collecting information about service access via social media as a means to triangulate on service delivery and quality. The global estimates group reliance on traditional surveillance techniques appears to result in inaccurate denominators and the inability to accurately measure progress towards HIV services access for vulnerable populations including MSM.

The care continua have become vital tools to monitor the HIV programmatic efforts and guide future actions to achieve the 90-90-90 target by 2020 or 73% of the estimated PLHIV virally suppressed along the continua (1, 2).

Discrimination, stigma, and lack of data regarding denominators are all obstacles to successful delivery of high quality services. HIV care programs specifically tailored for MSM, which include community-based HIV testing and immediate access to ART and viral load monitoring, need to be scaled-up in partnership with civil society organizations. This will not be possible without addressing the social and legal barriers impeding access to care for key populations. Additionally, more and better quality data on key populations is needed in the public domain to promote accountability and data-driven programs. Countries and organizations working with key populations need to strengthen their current monitoring and evaluation (M&E) systems so that more real-time, local and disaggregated programmatic data can be collected and continua can be standardized across countries. Investment in population-based surveys, targeted surveys in areas with high HIV prevalence among key populations, case-based reporting and unique identification codes can help countries construct more reliable continua for key populations (26). Community engagement will be critical in both the design and implementation of M&E activities to ensure a human rights framework is followed and that both communities and health authorities can own the data and work together to improve access to diagnosis and treatment. Social media, with its extraordinary reach, has considerable potential to improve the quality of the HIV response.

Achieving 90-90-90 is vital for MSM to prevent illness, death and transmission. However, 90-90-90 translates into 27% of PLHIV not on ART and virally suppressed. Knowing and being able to estimate the number of people who may be at risk is a fundamental element of public health and disease control. Gay dating applications and other social media platforms provide unique insights into how to reach and include people in solving the HIV problem. Gay dating applications can provide a powerful platform for peer-to-peer sharing of health information and delivering HIV-related services (27, 28) while also helping public health efforts by providing insights regarding the size and characteristics of the community. Social media has significant promise and may help provide the best information available to ensure that

MSM and other vulnerable people living with HIV and their communities are not left behind on the way to ending AIDS.



## REFERENCES

1. UNAIDS AIDS by the Numbers. UNAIDS, Geneva, 2016. Available from: [http://www.unaids.org/sites/default/files/media\\_asset/AIDS-by-the-numbers-2016\\_en.pdf](http://www.unaids.org/sites/default/files/media_asset/AIDS-by-the-numbers-2016_en.pdf). June 21th, 2017.
2. UNAIDS An ambitious treatment target to help end the AIDS epidemic. UNAIDS, Geneva, 2014. Available from: [http://www.unaids.org/sites/default/files/media\\_asset/90-90-90\\_en\\_0.pdf](http://www.unaids.org/sites/default/files/media_asset/90-90-90_en_0.pdf). June 21th, 2017.
3. Beyrer C, Baral SD, van Griensven F, Goodreau SM, Chariyalertsak S, Wirtz AL, et al. Global epidemiology of HIV infection in men who have sex with men. *Lancet*. 2012;380(9839):367-77.
4. Beyrer C, Baral SD, Collins C, Richardson ET, Sullivan PS, Sanchez J, et al. The global response to HIV in men who have sex with men. *Lancet*. 2016;388(10040):198-206.
5. Davis SL, Goedel WC, Emerson J, Guven BS. Punitive laws, key population size estimates, and Global AIDS Response Progress Reports: An ecological study of 154 countries. *Journal of the International AIDS Society*. 2017;20(1):1-8.
6. Grey JA, Bernstein KT, Sullivan PS, Purcell DW, Chesson HW, Gift TL, et al. Estimating the Population Sizes of Men Who Have Sex With Men in US States and Counties Using Data From the American Community Survey. *JMIR public health and surveillance*. 2016;2(1):e14.
7. Holland CE, Kouanda S, Lougue M, Pitche VP, Schwartz S, Anato S, et al. Using Population-Size Estimation and Cross-sectional Survey Methods to Evaluate HIV Service Coverage Among Key Populations in Burkina Faso and Togo. *Public health reports*. 2016;131(6):773-82.
8. Prah P, Hickson F, Bonell C, McDaid LM, Johnson AM, Wayal S, et al. Men who have sex with men in Great Britain: comparing methods and estimates from probability and convenience sample surveys. *Sexually transmitted infections*. 2016;92(6):455-63.
9. Safarnejad A, Nga NT, Son VH. Population Size Estimation of Men Who Have Sex with Men in Ho Chi Minh City and Nghe An Using Social App Multiplier Method. *Journal of urban health : bulletin of the New York Academy of Medicine*. 2017.
10. International Telecommunication Union. Data on Information and Communication Technology. Available from: <http://www.itu.int/en/ITU-D/Statistics/Pages/stat/default.aspx>. June 21st, 2017.
11. Falisi AL, Wiseman KP, Gaysynsky A, Scheideler JK, Ramin DA, Chou WS. Social media for breast cancer survivors: a literature review. *Journal of cancer survivorship : research and practice*. 2017.
12. Sinnenberg L, Buttenheim AM, Padrez K, Mancheno C, Ungar L, Merchant RM. Twitter as a Tool for Health Research: A Systematic Review. *American journal of public health*. 2017;107(1):143.
13. Tricco AC, Zarin W, Lillie E, Pham B, Straus SE. Utility of social media and crowd-sourced data for pharmacovigilance: a scoping review protocol. *BMJ open*. 2017;7(1):e013474.
14. Valente TW, Pitts SR. An Appraisal of Social Network Theory and Analysis as Applied to Public Health: Challenges and Opportunities. *Annual review of public health*. 2017;38:103-18.
15. Hornet Networks. Available from: <http://love.hornetapp.com/>. June 21st, 2017.
16. UNAIDS AIDSinfo Online Database. Available from: <http://www.aidsinfoonline.org/devinfo/libraries.aspx/Home.aspx>. June 22nd, 2017.
17. PEPFAR. Country/Regional Operational Plan 2017 Strategic Direction Summary. Available from: <http://www.pepfar.gov/countries/cop/fy2017/c76721.htm>. June 18th, 2017.

18. Global HIV 90-90-90 Watch. International Association of Providers of AIDS Care, Washington DC. Available from: <http://www.HIV90-90-90watch.org>. June 15th, 2017.
19. Granich R, Gupta S, Hall I, Aberle-Grasse J, Hader S, Mermin J. Status and methodology of publicly available national HIV care continua and 90-90-90 targets: A systematic review. *PLoS medicine*. 2017;14(4):e1002253.
20. Gupta S, Granich R. National HIV Care Continua for Key Populations. *Journal of the International Association of Providers of AIDS Care*. 2017;16(2):125-32.
21. Cohen MS, Chen YQ, McCauley M, Gamble T, Hosseinipour MC, Kumarasamy N, et al. Prevention of HIV-1 infection with early antiretroviral therapy. *The New England journal of medicine*. 2011;365(6):493-505.
22. Granich RM, Gilks CF, Dye C, De Cock KM, Williams BG. Universal voluntary HIV testing with immediate antiretroviral therapy as a strategy for elimination of HIV transmission: a mathematical model. *Lancet*. 2009;373(9657):48-57.
23. Group ISS, Lundgren JD, Babiker AG, Gordin F, Emery S, Grund B, et al. Initiation of Antiretroviral Therapy in Early Asymptomatic HIV Infection. *The New England journal of medicine*. 2015;373(9):795-807.
24. Group TAS, Danel C, Moh R, Gabillard D, Badje A, Le Carrou J, et al. A Trial of Early Antiretrovirals and Isoniazid Preventive Therapy in Africa. *The New England journal of medicine*. 2015;373(9):808-22.
25. Gardner EM, McLees MP, Steiner JF, Del Rio C, Burman WJ. The spectrum of engagement in HIV care and its relevance to test-and-treat strategies for prevention of HIV infection. *Clinical infectious diseases : an official publication of the Infectious Diseases Society of America*. 2011;52(6):793-800.
26. Hladik W, Benech I, Bateganya M, Hakim AJ. The utility of population-based surveys to describe the continuum of HIV services for key and general populations. *International journal of STD & AIDS*. 2016;27(1):5-12.
27. Muessig KE, Nekkanti M, Bauermeister J, Bull S, Hightow-Weidman LB. A systematic review of recent smartphone, Internet and Web 2.0 interventions to address the HIV continuum of care. *Current HIV/AIDS reports*. 2015;12(1):173-90.
28. Taggart T, Grewe ME, Conserve DF, Gliwa C, Roman Isler M. Social Media and HIV: A Systematic Review of Uses of Social Media in HIV Communication. *Journal of medical Internet research*. 2015;17(11):e248.

**Figure 1: Gay dating application users compared to UNAIDS size estimates for men who have sex with men (MSM)**

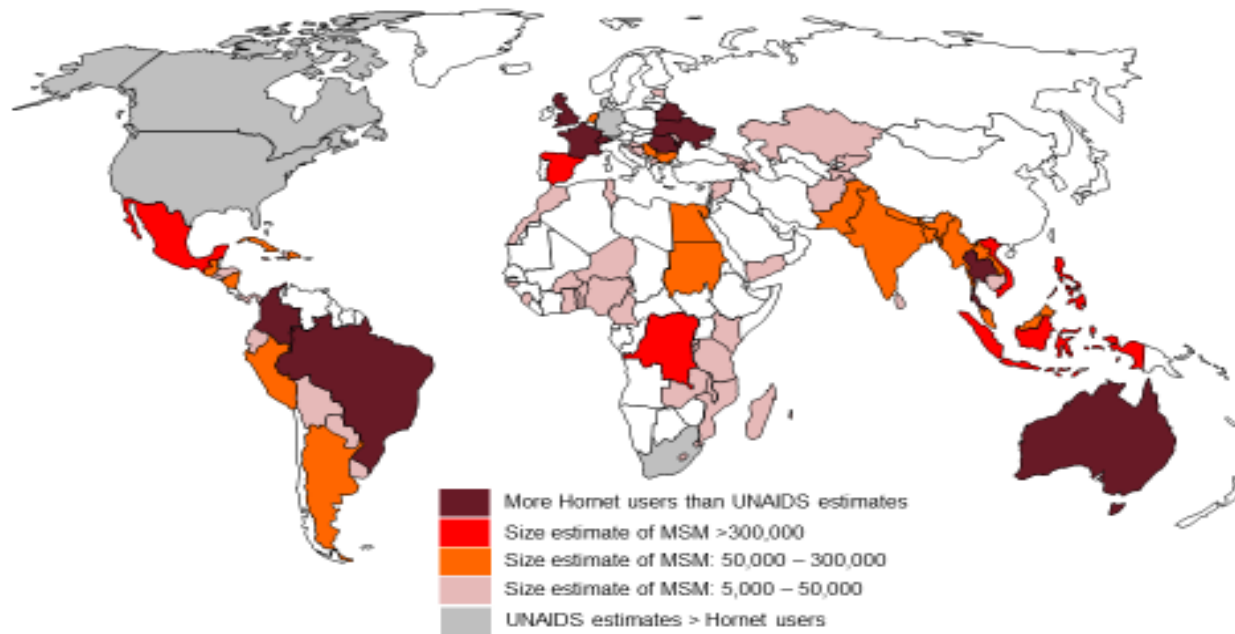

In France, Thailand and Romania, Hornet users are double than the UNAIDS estimates. White represents countries with no data or <5,000 MSM. The size estimates of MSM (for countries in red, orange and pink) are from UNAIDS AIDSinfo Online Database

Application users are double than the UNAIDS estimates in France, Romania and Thailand. The size estimates of MSM (for countries in red, orange and pink) are from UNAIDS AIDSinfo Online Database<sup>16</sup> [no Hornet data available for these countries]. White represents countries with no data or <5,000 MSM according to UNAIDS size estimates.

**Table 1: Gay dating application users, UNAIDS national estimates of MSM, 90-90-90 and care continua**

| Country        | ART eligibility                              | Hornet Users | UNAIDS/ National Estimates (MSM) | UNAIDS vs. Hornet (difference) | MSM living with HIV (N,%) | MSM Diagnosed (N,%) | 90-90-90 MSM living with HIV diagnosed (N,%) | MSM on ART (N,%) | 90-90-90 MSM diagnosed with HIV on ART (N,%) | MSM living with HIV Virally suppressed (N,%) | 90-90-90 MSM on ART Virally Suppressed (N,%) |
|----------------|----------------------------------------------|--------------|----------------------------------|--------------------------------|---------------------------|---------------------|----------------------------------------------|------------------|----------------------------------------------|----------------------------------------------|----------------------------------------------|
| Brazil         | Irrespective of CD4                          | 3,056,261    | 2,037,741                        | -1,018,520                     | Failed to report*         | Failed to report    | Failed to report                             | Failed to report | Failed to report                             | Failed to report                             | Failed to report                             |
| United States  | Irrespective of CD4                          | 2,482,802    | 4,503,080*                       | 2,020,278                      | 666,900                   | 568,200 (85%)       | 85%                                          | 237,226 (36%)    | 42%                                          | 206,082 (31%)                                | 87%                                          |
| France         | Irrespective of CD4                          | 1,252,519    | 330,000                          | -922,519                       | 53,200                    | 44,000 (83%)        | 83%                                          | 33,400 (63%)     | 76%                                          | 29,100 (55%)                                 | 87%                                          |
| Thailand       | Irrespective of CD4                          | 1,174,942    | 571,000                          | -603,942                       | 41,299                    | Failed to report    | Failed to report                             | 2,687 (7%)       | Failed to report                             | 1,123 (3%)                                   | 42%                                          |
| United Kingdom | Irrespective of CD4                          | 833,022      | 424,200                          | -408,822                       | 47,000                    | 41,200 (88%)        | 88%                                          | 39,185 (83%)     | 95%                                          | 37,301 (79%)                                 | 95%                                          |
| Taiwan         | NA                                           | 606,869      | Failed to report                 | -                              | Failed to report          | Failed to report    | Failed to report                             | Failed to report | Failed to report                             | Failed to report                             | Failed to report                             |
| Italy          | Irrespective of CD4                          | 339,248      | Failed to report                 | -                              | Failed to report          | Failed to report    | Failed to report                             | Failed to report | Failed to report                             | Failed to report                             | Failed to report                             |
| Canada         | Irrespective of CD4                          | 312,663      | 369,532                          | 56,869                         | Failed to report          | Failed to report    | Failed to report                             | Failed to report | Failed to report                             | Failed to report                             | Failed to report                             |
| Australia      | Irrespective of CD4                          | 302,702      | 190,000                          | -112,702                       | Failed to report          | Failed to report    | Failed to report                             | Failed to report | Failed to report                             | Failed to report                             | Failed to report                             |
| Germany        | Irrespective of CD4                          | 250,227      | 750,000                          | 499,773                        | Failed to report          | Failed to report    | Failed to report                             | Failed to report | Failed to report                             | Failed to report                             | Failed to report                             |
| Ukraine        | <500, irrespective for high-risk populations | 242,670      | 176,000                          | -66,670                        | 15,870                    | 4,126 (26%)         | 26%                                          | 1,111 (7%)       | 27%                                          | Failed to report                             | Failed to report                             |
| Chile          | <500                                         | 185,374      | Failed to report                 | -                              | Failed to report          | Failed to report    | Failed to report                             | Failed to report | Failed to report                             | Failed to report                             | Failed to report                             |
| Colombia       | <500                                         | 175,741      | 130,780                          | -44,961                        | Failed to report          | Failed to report    | Failed to report                             | Failed to report | Failed to report                             | Failed to report                             | Failed to report                             |
| Switzerland    | Irrespective of CD4                          | 120,286      | 80,000                           | -40,286                        | Failed to report          | Failed to report    | Failed to report                             | Failed to report | Failed to report                             | Failed to report                             | Failed to report                             |
| Japan          | Irrespective of CD4                          | 104,710      | Failed to report                 | -                              | Failed to report          | Failed to report    | Failed to report                             | Failed to report | Failed to report                             | Failed to report                             | Failed to report                             |

| Country        | ART eligibility     | Hornet Users | UNAIDS/ National Estimates (MSM) | UNAIDS vs. Hornet (difference) | MSM living with HIV (N,%) | MSM Diagnosed (N,%) | 90-90-90 MSM living with HIV diagnosed (N,%) | MSM on ART (N,%) | 90-90-90 MSM diagnosed with HIV on ART (N,%) | MSM living with HIV Virally suppressed (N,%) | 90-90-90 MSM on ART Virally Suppressed (N,%) |
|----------------|---------------------|--------------|----------------------------------|--------------------------------|---------------------------|---------------------|----------------------------------------------|------------------|----------------------------------------------|----------------------------------------------|----------------------------------------------|
| Belgium        | NA                  | 92,442       | Failed to report                 | -                              | Failed to report          | Failed to report    | Failed to report                             | Failed to report | Failed to report                             | Failed to report                             | Failed to report                             |
| Belarus        | <200                | 89,885       | 60,000                           | -29,885                        | Failed to report          | Failed to report    | Failed to report                             | Failed to report | Failed to report                             | Failed to report                             | Failed to report                             |
| Hong Kong      | Irrespective of CD4 | 81,583       | Failed to report                 | -                              | Failed to report          | Failed to report    | Failed to report                             | Failed to report | Failed to report                             | Failed to report                             | Failed to report                             |
| Portugal       | Irrespective of CD4 | 63,089       | Failed to report                 | -                              | Failed to report          | Failed to report    | Failed to report                             | Failed to report | Failed to report                             | Failed to report                             | Failed to report                             |
| New Zealand    | Irrespective of CD4 | 53,033       | Failed to report                 | -                              | Failed to report          | Failed to report    | Failed to report                             | Failed to report | Failed to report                             | Failed to report                             | Failed to report                             |
| Venezuela      | <500                | 52,907       | Failed to report                 | -                              | Failed to report          | Failed to report    | Failed to report                             | Failed to report | Failed to report                             | Failed to report                             | Failed to report                             |
| Poland         | Irrespective of CD4 | 50,069       | Failed to report                 | -                              | Failed to report          | Failed to report    | Failed to report                             | Failed to report | Failed to report                             | Failed to report                             | Failed to report                             |
| Denmark        | Irrespective of CD4 | 45,557       | 50,000                           | 4,443                          | 2,938                     | 2,321 (79%)         | 79%                                          | 2,150 (73%)      | 93%                                          | 2,119 (72%)                                  | 99%                                          |
| Ireland        | NA                  | 44,054       | Failed to report                 | -                              | Failed to report          | Failed to report    | Failed to report                             | Failed to report | Failed to report                             | Failed to report                             | Failed to report                             |
| Romania        | Irrespective of CD4 | 41,970       | 10,507                           | -31,463                        | Failed to report          | Failed to report    | Failed to report                             | Failed to report | Failed to report                             | Failed to report                             | Failed to report                             |
| Sweden         | Irrespective of CD4 | 40,592       | Failed to report                 | -                              | Failed to report          | Failed to report    | Failed to report                             | Failed to report | Failed to report                             | Failed to report                             | Failed to report                             |
| South Africa   | Irrespective of CD4 | 38,013       | 654,979*                         | 616,966                        | 336,000                   | Failed to report    | Failed to report                             | 110,880 (33%)    | Failed to report                             | Failed to report                             | Failed to report                             |
| Czech Republic | NA                  | 34,399       | Failed to report                 | -                              | Failed to report          | Failed to report    | Failed to report                             | Failed to report | Failed to report                             | Failed to report                             | Failed to report                             |
| Costa Rica     | <350                | 27,996       | Failed to report                 | -                              | Failed to report          | Failed to report    | Failed to report                             | Failed to report | Failed to report                             | Failed to report                             | Failed to report                             |

\* South Africa MSM size estimate from PEPFAR COP<sup>17</sup> and for United States estimate it from Grey et al 2016<sup>6</sup>. Other estimates are from UNAIDS AIDSinfo Online Database<sup>16</sup>. NA - not available. Internet search failed to find the data in the public domain. If these data exist in public domain then please do contact the authors so they can update www.HIV90-90-90watch.org and www.hivpolicywatch.org websites.

Green signifies reported number; Red signifies potential underestimation, grey signifies failure to report.
